CORRECTION

# Correction: Low level of plasma DNase is associated with worse clinical outcome in testicular germ cell tumor patients and exogenous DNase I improves (Leverages) cisplatin treatment efficacy

Mego Michal, Vlkova Barbora, Kalavska Katarina, Pastorek Michal, Cierna Zuzana, Sestakova Zuzana, Chovanec Miroslav, Udovorkova Natalia, Kucerova Lucia, Celec Peter

The word “(Leverages)” should not be included in the article title. The correct title is: Low level of plasma DNase is associated with worse clinical outcome in testicular germ cell tumor patients and exogenous DNase I improves cisplatin treatment efficacy.

Additionally, the author initials appear incorrectly in the citation. The correct citation is: Mego M, Vlkova B, Kalavska K, Pastorek M, Cierna Z, Sestakova Z, et al. (2025) Low level of plasma DNase is associated with worse clinical outcome in testicular germ cell tumor patients and exogenous DNase I improves cisplatin treatment efficacy. PLoS One 20(12): e0336190. <https://doi.org/10.1371/journal.pone.0336190>.

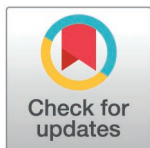

## Reference

1. Michal M, Barbora V, Katarina K, Michal P, Zuzana C, Zuzana S, et al. Low level of plasma DNase is associated with worse clinical outcome in testicular germ cell tumor patients and exogenous DNase I improves (Leverages) cisplatin treatment efficacy. PLoS One. 2025;20(12):e0336190. <https://doi.org/10.1371/journal.pone.0336190> PMID: [41343562](https://pubmed.ncbi.nlm.nih.gov/41343562/)

## OPEN ACCESS

**Citation:** Michal M, Barbora V, Katarina K, Michal P, Zuzana C, Zuzana S, et al. (2025) Correction: Low level of plasma DNase is associated with worse clinical outcome in testicular germ cell tumor patients and exogenous DNase I improves (Leverages) cisplatin treatment efficacy. PLoS One 20(12): e0340033. <https://doi.org/10.1371/journal.pone.0340033>

**Published:** December 31, 2025

**Copyright:** © 2025 Michal et al. This is an open access article distributed under the terms of the [Creative Commons Attribution License](https://creativecommons.org/licenses/by/4.0/), which permits unrestricted use, distribution, and reproduction in any medium, provided the original author and source are credited.
